# Supplementary material for: Racial and Ethnic Differences in Cardiac Rehabilitation Participation: Effect Modification by Household Income
Source: PubMed Central journal article supplement — J Am Heart Assoc. 2022 Jun 22;11(13):e025591. doi: 10.1161/JAHA.122.025591 (PMC9333381; doi:10.1161/jaha.122.025591), 2022-06-22
Supplement: JAH3-11-e025591-s001.pdf [file JAH3-11-e025591-s001.pdf]

# **SUPPLEMENTAL MATERIAL**

**Table S1. Summary of ICD-9, ICD-10, and CPT codes.**

|                                        | <b>ICD-9</b>                                                                                                                                                                                                                                   | <b>ICD-10</b>                                                                                                                                                          | <b>CPT</b>                                                                                                                                                             |
|----------------------------------------|------------------------------------------------------------------------------------------------------------------------------------------------------------------------------------------------------------------------------------------------|------------------------------------------------------------------------------------------------------------------------------------------------------------------------|------------------------------------------------------------------------------------------------------------------------------------------------------------------------|
| <b>Myocardial Infarction</b>           | 410.00, 410.01, 410.02, 410.10, 410.11, 410.12, 410.20, 410.21, 410.22, 410.30, 410.31, 410.32, 410.40, 410.41, 410.42, 410.50, 410.51, 410.52, 410.60, 410.61, 410.62, 410.70, 410.71, 410.72, 410.80, 410.81, 410.82, 410.90, 410.91, 410.92 | I21.0, I21.01, I21.02, I21.09, I21.1, I21.11, I21.19, I21.2, I21.21, I21.29, I21.3, I21.4, I21.9, I21.A1†, I21.A9†, I22.0, I22.1, I22.2, I22.8, I22.9                  |                                                                                                                                                                        |
| <b>Coronary Artery Bypass Grafting</b> | 36.10, 36.11, 36.12, 36.13, 36.14, 36.15, 36.16, 36.17, 36.19, 36.2                                                                                                                                                                            | 0210X, 0211X, 0212X, 0213X                                                                                                                                             | 33510, 33511, 33512, 33513, 33514, 33516, 33517, 33518, 33519, 33521, 33522, 33523, 33530, 33533, 33534, 33535, 33536, 33572, 35600, S2205, S2206, S2207, S2208, S2209 |
| <b>Valve Repair/Replacement</b>        | 35.00, 35.01, 35.02, 35.03, 35.04, 35.05, 35.06, 35.07, 35.08, 35.09, 35.10, 35.11, 35.12, 35.13, 35.14, 35.20, 35.21, 35.22, 35.23, 35.24, 35.25, 35.26, 35.27, 35.28, 35.33, 35.96, 35.97, 35.99                                             | 027F, 027G, 027H, 027J, 02CF, 02CG, 02CH, 02CJ, 02NF, 02NG, 02NH, 02NJ, 02QF, 02QG, 02QH, 02QJ, 02RF, 02RG, 02RH, 02RJ, 02ND, 02VG, 02UF, 02UG, 02UH, 02UJ, 06BQ, 5A12 | 33361-33417, 33418-33430, 33460-33468, 33470-33478                                                                                                                     |

Table S2. Summary of Elixhauser comorbidity ICD10 codes.

| Group | DX                                             | Weight (AHQR) | Weight (van Walraven) | CORRESPONDING CODES |       |       |       |       |       |       |       |       |       |       |       |       |       |       |       |       |       |       |       |       |       |       |      |  |  |  |  |  |
|-------|------------------------------------------------|---------------|-----------------------|---------------------|-------|-------|-------|-------|-------|-------|-------|-------|-------|-------|-------|-------|-------|-------|-------|-------|-------|-------|-------|-------|-------|-------|------|--|--|--|--|--|
| 1     | CHF                                            | 9             | 7                     | I09.9               | I11.0 | I13.0 | I13.2 | I25.5 | I42.0 | I42.5 | I42.6 | I42.7 | I42.8 | I42.9 | I43.X | I50.X | P29.0 |       |       |       |       |       |       |       |       |       |      |  |  |  |  |  |
| 2     | Arrhythmias                                    | 0             | 5                     | I44.1               | I44.2 | I44.3 | I45.6 | I45.9 | I47.X | I48.X | I49.X | R00.0 | R00.1 | R00.8 | T82.1 | Z45.0 | Z95.0 |       |       |       |       |       |       |       |       |       |      |  |  |  |  |  |
| 3     | Valvular disease                               | 0             | -1                    | A52.0               | I05.X | I06.X | I07.X | I08.X | I09.1 | I09.8 | I34.X | I35.X | I36.X | I37.X | I38.X | I39.X | Q23.0 | Q23.1 | Q23.2 | Q23.3 | Z95.2 | Z95.3 | Z95.4 |       |       |       |      |  |  |  |  |  |
| 4     | Pulmonary circulation disorders                | 6             | 4                     | I26.X               | I27.X | I28.0 | I28.8 | I28.9 |       |       |       |       |       |       |       |       |       |       |       |       |       |       |       |       |       |       |      |  |  |  |  |  |
| 5     | Peripheral vascular disorders                  | 3             | 2                     | I70.X               | I71.  | I73.1 | I73.8 | I73.9 | I77.1 | I79.0 | I79.2 | K55.1 | K55.8 | K55.9 | Z95.8 | Z95.9 |       |       |       |       |       |       |       |       |       |       |      |  |  |  |  |  |
| 6     | Hypertension (uncomplicated)                   | -1            | 0                     | I10.                |       |       |       |       |       |       |       |       |       |       |       |       |       |       |       |       |       |       |       |       |       |       |      |  |  |  |  |  |
| 7     | Hypertension (complicated)                     | -1            | 0                     | I11.X               | I12.X | I13.X | I15.X |       |       |       |       |       |       |       |       |       |       |       |       |       |       |       |       |       |       |       |      |  |  |  |  |  |
| 8     | Paralysis                                      | 5             | 7                     | G04.1               | G11.4 | G80.1 | G80.2 | G81.X | G82.X | G83.0 | G83.1 | G83.2 | G83.3 | G84.4 | G83.9 |       |       |       |       |       |       |       |       |       |       |       |      |  |  |  |  |  |
| 9     | Other neurological disorders                   | 5             | 6                     | G10.X               | G11.X | G12.X | G13.X | G20.X | G21.X | G22.X | G25.4 | G25.5 | G31.2 | G31.8 | G31.9 | G32.X | G35.X | G36.X | G37.X | G40.X | G41.X | G93.1 | G93.4 | R47.0 | R56.X |       |      |  |  |  |  |  |
| 10    | Chronic pulmonary disease                      | 3             | 3                     | I27.8               | I27.9 | J40.x | J41.X | J42.X | J43.X | J44.X | J45.X | J46.X | J47.X | J60   | J61   | J62   | J63   | J64   | J65   | J66   | J67   | J68.4 | J70.1 | J70.3 |       |       |      |  |  |  |  |  |
| 11    | Diabetes (uncomplicated)                       | 0             | 0                     | E10.0               | E10.1 | E10.9 | E11.0 | E11.1 | E11.9 | E12.0 | E12.1 | E12.9 | E13.0 | E13.1 | E13.9 | E14.0 | E14.1 | E14.9 |       |       |       |       |       |       |       |       |      |  |  |  |  |  |
| 12    | Diabetes (complicated)                         | -3            | 0                     | E10.2               | E10.3 | E10.4 | E10.5 | E10.6 | E10.7 | E10.8 | E11.2 | E11.3 | E11.4 | E11.5 | E11.6 | E11.7 | E11.8 | E12.2 | E12.3 | E12.4 | E12.5 | E12.6 | E12.7 | E12.8 | E13.2 | E13.3 |      |  |  |  |  |  |
| 13    | Hypothyroidism                                 | 0             | 0                     | E00.X               | E01.X | E02.X | E03.X | E89.0 |       |       |       |       |       |       |       |       |       |       |       |       |       |       |       |       |       |       |      |  |  |  |  |  |
| 14    | Renal failure                                  | 6             | 5                     | I12.0               | I13.1 | N18.X | N19.X | N25.0 | Z49.0 | Z49.1 | Z49.2 | Z94.0 | Z99.2 |       |       |       |       |       |       |       |       |       |       |       |       |       |      |  |  |  |  |  |
| 15    | Liver disease                                  | 4             | 11                    | B18.X               | I85.X | I86.4 | I98.2 | K70.X | K71.1 | K71.3 | K71.4 | K71.5 | K71.7 | K72.X | K73.X | K74.4 | K76.0 | K76.2 | K76.3 | K76.4 | K76.5 | K76.6 | K76.7 | K76.8 | K76.9 | Z94.4 |      |  |  |  |  |  |
| 16    | Peptic ulcer disease (excluding bleeding)      | 0             | 0                     | K25.7               | K25.9 | K26.7 | K26.9 | K27.7 | K27.9 | K28.7 | K28.9 |       |       |       |       |       |       |       |       |       |       |       |       |       |       |       |      |  |  |  |  |  |
| 17    | AIDS/HIV                                       | 0             | 8                     | B20.X               | B21.X | B22.X | B24.X |       |       |       |       |       |       |       |       |       |       |       |       |       |       |       |       |       |       |       |      |  |  |  |  |  |
| 18    | Lymphoma                                       | 6             | 9                     | C81.                | C82.  | C83.  | C84.  | C85.  | C88.  | C96.  | C90.0 | C90.2 |       |       |       |       |       |       |       |       |       |       |       |       |       |       |      |  |  |  |  |  |
| 19    | Metastatic cancer                              | 14            | 12                    | C77.                | C78.  | C79.  | C80.  |       |       |       |       |       |       |       |       |       |       |       |       |       |       |       |       |       |       |       |      |  |  |  |  |  |
| 20    | Solid tumor w/o metastasis                     | 7             | 4                     | C00.                | C01.  | C02.  | C03.  | C04.  | C05.  | C06.  | C07.  | C08.  | C09.  | C10.  | C11.  | C12.  | C13.  | C14.  | C15.  | C16.  | C17.  | C18.  | C19.  | C20.  | C21.  | C22.  |      |  |  |  |  |  |
|       |                                                |               |                       | C23.                | C24.  | C25.  | C26.  | C30.  | C31.  | C32.  | C33.  | C34.  | C37.  | C38.  | C39.  | C40.  | C41.  | C43.  | C45.  | C46.  | C47.  | C48.  | C49.  | C50.  | C51.  | C52.  |      |  |  |  |  |  |
|       |                                                |               |                       | C53.                | C54.  | C55.  | C56.  | C57.  | C58.  | C60.  | C61.  | C62.  | C63.  | C64.  | C65.  | C66.  | C67.  | C68.  | C69.  | C70.  | C71.  | C72.  | C73.  | C74.  | C75.  | C76.  | C97. |  |  |  |  |  |
| 21    | Rheumatoid arthritis/collagen vascular disease | 0             | 0                     | L94.0               | L94.1 | L94.3 | M05.X | M06.X | M08.X | M12.0 | M12.3 | M30.X | M31.0 | M31.1 | M31.2 | M31.3 | M32.  | M33.  | M34.  | M35.  | M45.  | M46.1 | M46.8 | M46.9 |       |       |      |  |  |  |  |  |
| 22    | Coagulopathy                                   | 11            | 3                     | D65.                | D66.  | D67.  | D68.  | D69.1 | D69.3 | D69.4 | D69.5 | D69.6 |       |       |       |       |       |       |       |       |       |       |       |       |       |       |      |  |  |  |  |  |
| 23    | Obesity                                        | -5            | -4                    | E66.                |       |       |       |       |       |       |       |       |       |       |       |       |       |       |       |       |       |       |       |       |       |       |      |  |  |  |  |  |
| 24    | Weight loss                                    | 9             | 6                     | E40.                | E41.  | E42.  | E43.  | E44.  | E45.  | E46.  | R63.4 | R64.  |       |       |       |       |       |       |       |       |       |       |       |       |       |       |      |  |  |  |  |  |
| 25    | Fluid and electrolyte disorders                | 11            | 5                     | E22.2               | E86.x | E87.x |       |       |       |       |       |       |       |       |       |       |       |       |       |       |       |       |       |       |       |       |      |  |  |  |  |  |
| 26    | Blood loss anemia                              | -3            | -2                    | D50.0               |       |       |       |       |       |       |       |       |       |       |       |       |       |       |       |       |       |       |       |       |       |       |      |  |  |  |  |  |
| 27    | Deficiency anemia                              | -2            | -2                    | D50.8               | D50.9 | D51.  | D52.  | D53.  |       |       |       |       |       |       |       |       |       |       |       |       |       |       |       |       |       |       |      |  |  |  |  |  |
| 28    | Alcohol abuse                                  | -1            | 0                     | F10                 | E52   | G62.1 | I42.6 | K29.2 | K70.0 | K70.3 | K70.9 | T51.  | Z50.2 | Z71.4 | Z72.1 |       |       |       |       |       |       |       |       |       |       |       |      |  |  |  |  |  |
| 29    | Drug abuse                                     | -7            | -7                    | F11.                | F12.  | F13.  | F14.  | F15.  | F16.  | F18.  | F19.  | Z71.5 | Z72.2 |       |       |       |       |       |       |       |       |       |       |       |       |       |      |  |  |  |  |  |
| 30    | Psychoses                                      | -5            | 0                     | F20.                | F22.  | F23.  | F24.  | F25.  | F28.  | F29.  | F30.  | F30.2 | F31.2 | F31.5 |       |       |       |       |       |       |       |       |       |       |       |       |      |  |  |  |  |  |
| 31    | Depression                                     | -5            | 3                     | F20.4               | F31.3 | F31.4 | F31.5 | F32.  | F33.  | F34.1 | F41.2 | F43.2 |       |       |       |       |       |       |       |       |       |       |       |       |       |       |      |  |  |  |  |  |

source: <https://cran.r-project.org/web/packages/comorbidity/vignettes/comorbiditiescores.html>

source: Coding algorithms for defining comorbidities in ICD-9-CM and ICD-10 administrative data. Quan et al. Med Care 2005.

**Table S3. Associations between race or ethnicity and participation in cardiac rehabilitation, by age.**

| Outcome* by age, RR (95% CI)                      | Race or Ethnicity        |                            |                              |                            | <i>P</i> , interaction <sup>†</sup> |
|---------------------------------------------------|--------------------------|----------------------------|------------------------------|----------------------------|-------------------------------------|
|                                                   | Asian<br>n = 2651 (2.5%) | Black<br>n = 12613 (11.8%) | Hispanic<br>n = 10462 (9.8%) | White<br>n = 81473 (76.0%) |                                     |
| <b>Attendance at ≥1 CR sessions<sup>‡</sup></b>   |                          |                            |                              |                            |                                     |
| <65 years                                         | 0.87 (0.79, 0.95)        | 0.85 (0.80, 0.91)          | 0.73 (0.68, 0.78)            | Ref                        | < 0.0001                            |
| ≥65                                               | 0.58 (0.53, 0.65)        | 0.80 (0.76, 0.84)          | 0.50 (0.47, 0.53)            | Ref                        |                                     |
| <b>Number of CR sessions attended<sup>§</sup></b> |                          |                            |                              |                            |                                     |
| <65 years                                         | 0.0 (-1.0, 1.0)          | 1.6 (0.8, 2.4)             | -0.1 (-0.8, 0.6)             | Ref                        | 0.002                               |
| ≥65                                               | 1.0 (-0.6, 2.6)          | 0.7 (-0.1, 1.5)            | -1.4 (-2.4, -0.4)            | Ref                        |                                     |
| <b>Time to initiation of CR, days<sup>§</sup></b> |                          |                            |                              |                            |                                     |
| <65 years                                         | 9.9 (4.2, 15.6)          | 8.6 (4.9, 12.3)            | 7.1 (3.0, 11.2)              | Ref                        | 0.95                                |
| ≥65                                               | 9.4 (3.2, 15.6)          | 11.1 (8.1, 14.1)           | 9.3 (5.6, 12.9)              | Ref                        |                                     |

CI indicates confidence interval; CR, cardiac rehabilitation; RR, risk ratio

\* Adjusted for income, sex, Elixhauser score, hypertension, diabetes, depression, ischemic stroke, education, and qualifying diagnosis. Robust variances were specified in all models.

<sup>†</sup> From Poisson or linear regression models with a term for interaction between race or ethnicity and age. *P*-values were calculated with the use of generalized score tests for binary outcomes and F-tests for continuous outcomes.

<sup>‡</sup> Risk ratios (95% CI) from Poisson regression models.

<sup>§</sup> Mean differences (95% CI) from linear regression models.

**Table S4. Unadjusted associations between race/ethnicity and participation in cardiac rehabilitation, by income.**

| Outcome* by income category,<br>RR (95% CI) | Race/Ethnicity           |                            |                              |                            | <i>P</i> , interaction <sup>†</sup> |
|---------------------------------------------|--------------------------|----------------------------|------------------------------|----------------------------|-------------------------------------|
|                                             | Asian<br>n = 2651 (2.5%) | Black<br>n = 12613 (11.8%) | Hispanic<br>n = 10462 (9.8%) | White<br>n = 81473 (76.0%) |                                     |
| Attendance at ≥1 CR sessions <sup>‡</sup>   |                          |                            |                              |                            |                                     |
| <40k                                        | 0.73 (0.58, 0.92)        | 0.70 (0.66, 0.75)          | 0.48 (0.43, 0.53)            | Ref                        | <0.0001                             |
| 40k to <60k                                 | 0.58 (0.45, 0.75)        | 0.69 (0.63, 0.75)          | 0.45 (0.40, 0.50)            | Ref                        |                                     |
| 60k to <75k                                 | 0.68 (0.55, 0.84)        | 0.68 (0.61, 0.76)          | 0.42 (0.36, 0.48)            | Ref                        |                                     |
| 75k to <100k                                | 0.66 (0.56, 0.77)        | 0.83 (0.75, 0.92)          | 0.63 (0.57, 0.70)            | Ref                        |                                     |
| ≥100k                                       | 0.74 (0.67, 0.81)        | 0.83 (0.75, 0.92)          | 0.67 (0.62, 0.73)            | Ref                        |                                     |
| Number of CR sessions attended <sup>§</sup> |                          |                            |                              |                            |                                     |
| <40k                                        | -0.4 (-3.8, 3.0)         | 0.3 (-0.7, 1.3)            | -1.2 (-2.7, 0.3)             | Ref                        | 0.20                                |
| 40k to <60k                                 | 1.3 (-2.5, 5.0)          | 0.5 (-0.9, 1.9)            | -2.0 (-3.7, -0.3)            | Ref                        |                                     |
| 60k to <75k                                 | -2.8 (-5.9, 0.4)         | 1.1 (-0.8, 3.0)            | -2.6 (-4.6, -0.5)            | Ref                        |                                     |
| 75k to <100k                                | 0.6 (-2.2, 3.4)          | 0.7 (-1.1, 2.4)            | -3.2 (-4.7, -1.7)            | Ref                        |                                     |
| ≥100k                                       | -2.6 (-4.0, -1.1)        | -1.4 (-2.9, 0.2)           | -2.1 (-3.4, -0.9)            | Ref                        |                                     |
| Time to initiation of CR, days <sup>§</sup> |                          |                            |                              |                            |                                     |
| <40k                                        | 9.1 (-5.0, 23.3)         | 11.9 (8.2, 15.7)           | 6.4 (0.6, 12.2)              | Ref                        | 0.35                                |
| 40k to <60k                                 | 7.1 (-8.0, 22.2)         | 14.2 (9.2, 19.1)           | 8.0 (2.4, 13.5)              | Ref                        |                                     |
| 60k to <75k                                 | -0.1 (-10.1, 9.8)        | 13.3 (6.5, 20.1)           | 6.6 (0.3, 12.9)              | Ref                        |                                     |
| 75k to <100k                                | 15.1 (5.1, 25.1)         | 12.6 (6.7, 18.5)           | 11.8 (5.6, 18.0)             | Ref                        |                                     |
| ≥100k                                       | 7.9 (2.2, 13.6)          | 5.3 (-0.2, 10.9)           | 8.5 (3.2, 13.7)              | Ref                        |                                     |

CI indicates confidence interval; CR, cardiac rehabilitation; RR, risk ratio

\* Robust variances were specified in all models.

<sup>†</sup> From Poisson or linear regression models with a term for interaction between race/ethnicity and income. *P*-values were calculated with the use of generalized score tests for binary outcomes and F-tests for continuous outcomes.

<sup>‡</sup> Risk ratios (95% CI) from Poisson regression models.

<sup>§</sup> Mean differences (95% CI) from linear regression models.
